1 Word count: 4163  
2 Abstract word count: 253  
3 Keywords:05  
4 Number of references: 32  
5 Number of tables: 03  
6 Number of figures: 01  
7

8 **Neck pain, dry eye and Sjögren's syndrome in Latin American students during the first**  
9 **wave of COVID-19: Frequencies and associated factors**

10

11 Christian R. Mejia<sup>1</sup>, Brigitte Gutarra-Laureano<sup>2</sup>, Ingrid L. Zorrilla-Lizana<sup>2</sup>, Dennis Arias-  
12 Chavez<sup>2</sup>, Maria F. Fernandez<sup>3</sup>, Claudia A. Vera<sup>4</sup>, Martin A. Vilela-Estrada<sup>5</sup>, Victor Serna-  
13 Alarcón<sup>5,6</sup>, Tatiana Requena<sup>7</sup>, Lysien Ivania Zambrano<sup>8</sup>, Eleonora Espinoza Turcios<sup>8</sup>

14

15 **Affiliations:**

16 <sup>1</sup> Universidad Norbert Wiener. Translational Medicine Research Centre. Lima, Peru.

17 <sup>2</sup> Universidad Continental. Huancayo, Peru.

18 <sup>3</sup> Universidad Privada de Tacna. Tacna, Peru.

19 <sup>4</sup> Instituto Nacional de Oftalmología. Lima, Peru.

20 <sup>5</sup> Escuela Profesional de Medicina Humana. Universidad Privada Antenor Orrego. Trujillo, Peru.

21 <sup>6</sup> Hospital Regional José Cayetano Heredia, EsSalud. Piura, Peru.

22 <sup>7</sup> Universidad Cesar Vallejo. Trujillo, Peru.

23 <sup>8</sup> Institute for Research in Medical Sciences and Right to Health (ICIMEDES)/Scientific Research  
24 Unit (UIC), Faculty of Medical Sciences (FCM), National Autonomous University of Honduras  
25 (UNAH). Tegucigalpa, Honduras.

26

27 **Corresponding authors:** Eleonora Espinoza Turcios [eleonora.espinoza@unah.edu.hn](mailto:eleonora.espinoza@unah.edu.hn), Instituto  
28 de Investigación en Ciencias Médicas y Derecho a la Salud (ICIMEDES)/Unidad de Investigación  
29 Científica (UIC), Edificio CM1, FCM, Calle La Salud, contiguo al Hospital Escuela, Tegucigalpa,  
30 M. D.C., Honduras, C.A. Código Postal: 11101.

31

32

NOTE: This preprint reports new research that has not been certified by peer review and should not be used to guide clinical practice.

33

## 34 Abstract

35

36 **Introduction:** Virtual classes brought many changes to the lives of students, not only the fact of  
37 being more exposed to screens, but also because of the repercussions. **Aim:** To determine the  
38 factors associated with suffering from neck pain, dry eye and Sjögren's syndrome in students in  
39 Latin America during the first wave of COVID-19. **Methodology:** Analytical cross-sectional  
40 study, using the COM and DEQ-5 scales, neck pain and dry eye/Sjögren's syndrome, respectively,  
41 were measured; socio-educational variables were associated with them. **Discussion:** Of the 3939  
42 students, those who lived in Panama, Chile and Bolivia were the ones who suffered the most from  
43 these pathologies. These pathologies were associated with the greater number of hours of  
44 computer use (all values  $p < 0,001$ ) and sex (all values  $p < 0,002$ ), medical students had more  
45 frequent dry eye and Sjögren's syndrome (both  $p < 0,031$ ), Graduate students had more neck pain  
46 ( $p < 0.001$ ), but college students had less dry eye ( $p = 0.025$ ) and those at private universities had  
47 more neck pain ( $p = 0.024$ ). **Discussion:** Important results of these three pathologies were found,  
48 this serves so that students can be evaluated in depth in each university, for a specialized diagnosis  
49 and try to avoid medium and long-term consequences for the constant use of electronic devices.  
50 **Conclusion:** Neck pain, dry eye and Sjögren's syndrome in students were associated with more  
51 hours of computer use and female sex, medical students had more frequent dry eye and Sjögren's  
52 syndrome, graduate students had more neck pain, university students had less dry eye and those  
53 from private universities had more neck pain.

54 **Keywords:** Education, Neck Pain, Dry Eye, Sjögren's Syndrome, Students.

55

## 56 Introduction

57 The pandemic generated a sudden change in education worldwide, according to  
58 UNESCO, the crisis affected about 363 million students worldwide, including 57.8 million  
59 students in higher education, in addition, a large percentage of these moved away from the  
60 classroom (1). All due to the quarantine, curfews and other social restrictions, which prevented  
61 him from going to the classrooms in person (2). In all this context, it was necessary to give an  
62 unexpected impulse to new forms of teaching. (3). Although, prior to the pandemic, some  
63 universities, schools, undergraduate and graduate programs had already opted for online learning,  
64 this never happened on such a large scale. (4, 5).

65

66 Therefore, educational institutions had to adapt quickly and, although at first, some  
67 institutions found it difficult to enter the world of online learning, after a while almost all had to  
68 resort to platforms and other virtual means for the dictation of their classes; thus opting for a  
69 comprehensive system of digital education (6, 7). This new model of education reduced the  
70 learning loss, but also generated some problems, including distraction, poor internet signal,  
71 equipment not suitable for receiving virtual classes, disinterest on the part of students, the large  
72 amount of plagiarism / copy or other bad practices in exams, among many others; which generated  
73 an incomplete learning process (8, 9).

74

75 As a result of this new form of teaching-learning, physio-ergonomic problems have been  
76 reported, due to the use of study environments that were not prepared or correctly set to receive  
77 classes virtually (10, 11). Since, the students had to have an appropriate computer, screen filters,  
78 ergonomic mice, seats that can be graduated according to the physiognomy of the student, an  
79 optimal lighting system, pauses / breaks from time to time; those that together avoid or reduce

80 health problems (11, 12). Although there were not many reports in students, previous problems  
81 had already been reported in workplaces, such as body aches, backaches, dry eyes, low back pain,  
82 carpal tunnel syndrome; among those who were for a long time in front of screens (12, 13).

83

84 For example, neck pain was reported between 10.4-21.3%, with a higher incidence in  
85 office and computer workers, neck pain between 0.4-86.8% (mean: 23.1%); being higher in  
86 women, high-income countries and urban areas (14). This situation has been little studied among  
87 university students, who were exposed the first 6 months of the pandemic to this radical change,  
88 especially in a population as diverse and varied as the Latin American region (15, 16). Therefore,  
89 the objective of the research was to determine the factors associated with suffering from neck  
90 pain, dry eye and Sjögren's syndrome in Latin American students during the first wave of COVID-  
91 19.

## 92 **Methodology**

93 Analytical cross-sectional research was conducted. The surveyed population were  
94 students from the countries of Peru, Chile, Paraguay, Mexico, Bolivia, Panama, Ecuador, Costa  
95 Rica, El Salvador, and Honduras; These were recruited during the months of June, July and  
96 August of the year 2020. Participants who agreed to be part of the research, who said they lived  
97 in some of these countries at the precise time the respondent was conducted, were included. Fewer  
98 than 300 students were excluded because they did not provide answers for the main tests (for the  
99 assessment of neck pain, dry eye or Sjögren's syndrome).

100 Non-random sampling was used. The statistical power of the association of each of the  
101 factors was obtained, the power was not enough for neck pain versus having technical studies  
102 (3%), or university (8%), or for studying medicine (76%); likewise, an adequate power was not  
103 obtained for the crossing of having dry eye or Sjögren's syndrome versus having university studies  
104 (67% and 64%, respectively); Therefore, these unique crossovers should be taken with caution  
105 for the discussion of results. The information was obtained, a quality control of the data was  
106 carried out and statistical analysis was carried out. All this was done in a sheet of the Microsoft  
107 Excel program, then the information was exported to a sheet of the Stata version 16 program  
108 (licensed by the group's statistician).

109

## 110 **Test**

111 Non-random sampling was used. The statistical power of the association of each of the  
112 factors was obtained, the power was not enough for neck pain versus having technical studies  
113 (3%), or university (8%), or for studying medicine (76%); likewise, an adequate power was not  
114 obtained for the crossing of having dry eye or Sjögren's syndrome versus having university studies  
115 (67% and 64%, respectively); Therefore, these unique crossovers should be taken with caution  
116 for the discussion of results. The information was obtained, a quality control of the data was  
117 carried out and statistical analysis was carried out. All this was done in a sheet of the Microsoft  
118 Excel program, then the information was exported to a sheet of the Stata version 16 program  
119 (licensed by the group's statistician) (17, 18).

120

121 For the results of dry eye and Sjögren's syndrome, the DEQ-5 questionnaire was used,  
122 where through 5 questions it was possible to evaluate the suffering of these two pathologies,  
123 through this questionnaire that was validated in the Mexican population and in other places (19,

124 20). To obtain dry eye, one had to have a score greater than 6 and to determine that one had  
125 Sjögren's syndrome a score greater than 12; This as a result of the total sum of each of the  
126 questions (21).

127 In addition, the variables of the country of residence, the sex of the respondents, the age,  
128 the degree of maximum education with which they had or were studying, the type of university  
129 in which they were enrolled, the number of years of study they had to date, if they studied human  
130 medicine, the number of hours they used the cell phone and the computer per day were counted.  
131 All these variables first went through a descriptive statistical analysis, where the frequency of  
132 presentation of each of the three pathologies according to the countries was obtained, with this it  
133 was possible to build a first figure. Then we proceeded to construct the tables of the crosses,  
134 where the crossing versus the socio-educational variables was obtained for each of the  
135 pathologies; This is where the frequency and percentage for the categorical variables were  
136 obtained, as well as the median and the interquartile range for the independent quantitative  
137 variables (this due to their condition of non-normality, evaluated through the Shapiro-Wilk  
138 statistical test).

139 Bivariate and multivariate analyses were also obtained for the crossing of each pathology  
140 according to the variables, this generated with the use of generalized linear models, where the  
141 Poisson family was used, the log link function, the adjustment for robust variants and by the  
142 country of residence; with this, the prevalence ratios were obtained (crude for the bivariate models  
143 and adjusted for the multivariate model), their 95% confidence intervals (95% CI) and their P  
144 values; for a variable to move from the bivariate to the multivariate model, it had to have a  $p < 0.05$   
145 value. At all times the significance value of 0.05 was considered and we always worked with a  
146 confidence level of 95%.

## 147 Ethics

148 Ethics were always respected, surveys were anonymous, and participants were free to  
149 participate or not participate in the research. The research was approved by the Bioethics  
150 Committee of the Antenor Orrego Private University, with Resolution No. 0013-2022-UPAO.

## 151 Results

152 Of the 3939 students surveyed in some Latin American countries, the countries that had  
153 the highest percentages of neck pain were Panama, Chile, and Peru (with ranges 20-40%), for dry  
154 eye were Chile, Bolivia, and Costa Rica (with ranges 29-65%) and for dry eye, Sjögren's  
155 syndrome were Chile, Bolivia and Panama (with ranges 16-35%). **Fig 1.**

156 **Figure 1.** Percentages of neck pain, dry eye and Sjögren's syndrome by country of residence  
157 during the first wave of the pandemic.

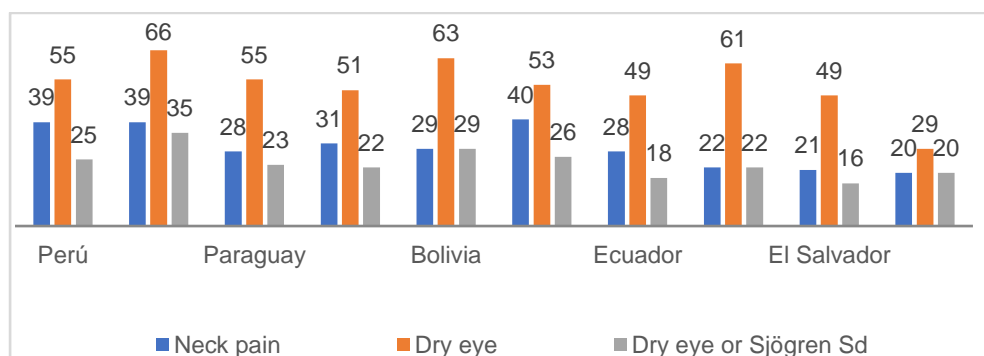

158

159 When analyzing the factors associated with neck pain, there was more frequency among those  
 160 with postgraduate studies (RPa: 1,75, IC95%: 1,31-2,33; value p<0,001), among those who were  
 161 from private universities (RPa: 1,16; IC95%: 1,02-1,33; value p=0,024) and according to the use  
 162 of more hours a day the computer (RPa: 1,05; IC95%: 1,04-1,05; value p<0,001), Men had less  
 163 frequency of neck pain (RPa: 0,67; IC95%: 0,59-0,76; value p<0,001), adjusted for year of study,  
 164 hours of cell phone use and country of residence. **Table 1**

165 **Table 1.** Descriptive and bivariate analysis of factors associated with neck pain among students  
 166 in Latin America in the first wave of COVID-19.

| Variable                   | Neck pain n (%) |                | RPc (IC95%) value          | RPa (IC95%) value p          |
|----------------------------|-----------------|----------------|----------------------------|------------------------------|
|                            | No              | Si             | p                          |                              |
| <b>Sex</b>                 |                 |                |                            |                              |
| Woman                      | 1139<br>(59,5)  | 776<br>(40,5)  | Comparison category        | Comparison category          |
| Male                       | 908 (73,2)      | 332<br>(26,8)  | 0,66 (0,61-0,72)<br><0,001 | 0,67 (0,59-0,76) <0,001      |
| <b>Age (years)*</b>        | 20 (19-<br>22)  | 20 (18-<br>22) | 0,97 (0,95-1,00) 0,069     | did not enter the final mode |
| <b>Maximum instruction</b> |                 |                |                            |                              |
| Secondary/high school or < | 616 (65,4)      | 326<br>(34,6)  | Comparison category        | Comparison category          |
| Technical studies          | 64 (65,3)       | 34 (34,7)      | 1,00 (0,87-1,15) 0,961     | 1,01 (0,80-1,27) 0,931       |
| University studies         | 1362<br>(64,8)  | 741<br>(35,2)  | 1,02 (0,95-1,09) 0,599     | 0,99 (0,92-1,05) 0,680       |
| Studies of posgrado        | 11 (52,4)       | 10 (47,6)      | 1,38 (1,03-1,84) 0,030     | 1,75 (1,31-2,33) <0,001      |
| <b>Type of university</b>  |                 |                |                            |                              |
| Public or state            | 773 (69,3)      | 343<br>(30,7)  | Comparison category        | Comparison category          |
| Private or private         | 1244<br>(62,3)  | 753<br>(37,7)  | 1,23 (1,06-1,43) 0,007     | 1,16 (1,02-1,33) 0,024       |
| <b>Year of studies*</b>    | 2 (1-4)         | 2 (1-3)        | 0,96 (0,93-0,99) 0,012     | 0,98 (0,95-1,01) 0,209       |
| <b>Study medicine</b>      |                 |                |                            |                              |

|                        |                |               |                            |                              |
|------------------------|----------------|---------------|----------------------------|------------------------------|
| No                     | 1166<br>(65,9) | 603<br>(34,1) | Comparison category        | did not enter the final mode |
| Yes                    | 866 (63,0)     | 508<br>(37,0) | 1,08 (0,90-1,31) 0,413     | did not enter the final mode |
| <b>Cell phone use*</b> | 8 (5-12)       | 9 (6-14)      | 1,02 (1,02-1,03)<br><0,001 | 1,00 (0,99-1,01) 0,619       |
| <b>Computer use*</b>   | 7 (4-10)       | 10 (6-14)     | 1,05 (1,04-1,05)<br><0,001 | 1,05 (1,04-1,05) <0,001      |

167 \*Variable taken quantitatively. Shours per day on average. The reasons for crude prevalence  
168 (RPa), Adjusted (RPa), the confidence intervals at 95% (IC95%) and p-values were obtained with  
169 generalized linear models (Poisson family, log link function, fit for robust variances and by  
170 country of residence).

171 For factors associated with dry eye, there was more dry eye among those studying medicine (RPa:  
172 1,09, IC95%: 1,01-1,17; valor p=0,030) and according to the use of more hours a day the  
173 computer (RPa: 1,02; IC95%: 1,02-1,03; valor p<0,001), In contrast, there was less frequency of  
174 dry eye among men (RPa: 0,76; IC95%: 0,69-0,85; valor p<0,001) and university students (RPa:  
175 0,93; IC95%: 0,88-0,99; valor p=0,025); adjusted for age, hours of cell phone use and country of  
176 residence. **Table 2**

177 **Table 2.** Descriptive and bivariate analysis of factors associated with dry eye among students in  
178 Latin America in the first wave of COVID-19.  
179

| Variable                   | Dry eye n (%)  |                | RPa (IC95%) Yes p          | RPa (IC95%) value p     |
|----------------------------|----------------|----------------|----------------------------|-------------------------|
|                            | No             | Yes            |                            |                         |
| <b>Sex</b>                 |                |                |                            |                         |
| Woman                      | 811 (38,6)     | 1291<br>(61,4) | Comparison category        | Comparison category     |
| Male                       | 747 (54,2)     | 632<br>(45,8)  | 0,75 (0,67-0,83)<br><0,001 | 0,76 (0,69-0,85) <0,001 |
| <b>Age (years)*</b>        | 20 (19-<br>22) | 20 (19-<br>22) | 0,98 (0,97-0,99) 0,004     | 0,99 (0,97-1,01) 0,466  |
| <b>Maximum instruction</b> |                |                |                            |                         |
| Secondary/high school or < | 446 (42,6)     | 600<br>(57,4)  | Comparison category        | Comparison category     |

|                           |                |                |                            |                               |
|---------------------------|----------------|----------------|----------------------------|-------------------------------|
| Technical studies         | 53 (49,5)      | 54 (50,5)      | 0,88 (0,72-1,06) 0,187     | 0,97 (0,82-1,16) 0,764        |
| University studies        | 1048<br>(45,3) | 1267<br>(54,7) | 0,95 (0,92-0,99) 0,011     | 0,93 (0,88-0,99) 0,025        |
| Postgraduate studies      | 14 (63,6)      | 8 (36,4)       | 0,63 (0,38-1,05) 0,075     | 0,67 (0,41-1,07) 0,095        |
| <b>Type of university</b> |                |                |                            |                               |
| Public or state           | 594 (47,1)     | 668<br>(52,9)  | Comparison category        | Did not enter the final model |
| Private or private        | 947 (43,3)     | 1239<br>(56,7) | 1,07 (0,99-1,15) 0,077     | Did not enter the final model |
| <b>Year of studies*</b>   | 2 (1-4)        | 2 (1-4)        | 1,00 (0,97-1,03) 0,769     | Did not enter the final model |
| <b>Study medicine</b>     |                |                |                            |                               |
| No                        | 930 (47,7)     | 1019<br>(52,3) | Comparison category        | Comparison category           |
| Yes                       | 615 (40,6)     | 900<br>(59,4)  | 1,14 (1,06-1,22) 0,001     | 1,09 (1,01-1,17) 0,030        |
| <b>Cell phone use*</b>    | 8 (5-12)       | 8 (5-12)       | 1,01 (1,00-1,02) 0,001     | 1,00 (0,99-1,01) 0,603        |
| <b>Computer use*</b>      | 8 (4-10)       | 8 (5-12)       | 1,02 (1,02-1,03)<br><0,001 | 1,02 (1,02-1,03) <0,001       |

180 \*Variable taken quantitatively. \$hours per day on average. The reasons for crude prevalence  
181 (R<sub>Pc</sub>), Adjusted (R<sub>Pa</sub>), the confidence intervals at 95% (IC95%) and p-values were obtained with  
182 generalized linear models (Poisson family, log link function, fit for robust variances and by  
183 country of residence).

184 There was a higher frequency of Sjögren's syndrome among those studying medicine (R<sub>Pa</sub>: 1,22;  
185 IC95%: 1,05-1,41; valor p=0,008) and according to the use of more hours a day the computer  
186 (R<sub>Pa</sub>: 1,05; IC95%: 1,04-1,07; valor p<0,001), in contrast, men had less Sjögren's syndrome  
187 (R<sub>Pa</sub>: 0,70; IC95%: 0,56-0,87; valor p=0,001); **Table 3**

188

189 **Table 3.** Descriptive and bivariate analysis of factors associated with Sjögren's syndrome  
190 among students in Latin America in the first wave of COVID-19.

| Variable | Sjögren's syndrome n (%) |     | R <sub>Pc</sub> (IC95%) value p | R <sub>Pa</sub> (IC95%) value p |
|----------|--------------------------|-----|---------------------------------|---------------------------------|
|          | No                       | Yes |                                 |                                 |

Sex

|                             |             |            |                         |                               |
|-----------------------------|-------------|------------|-------------------------|-------------------------------|
| Woman                       | 1492 (71,0) | 610 (29,0) | Comparison category     | Comparison category           |
| Male                        | 1116 (80,9) | 263 (19,1) | 0,66 (0,55-0,78) <0,001 | 0,70 (0,56-0,87) 0,001        |
| <b>Age (years)*</b>         | 20 (19-22)  | 20 (18-22) | 0,97 (0,94-1,01) 0,142  | Did not enter the final model |
| <b>Maximum instruction</b>  |             |            |                         |                               |
| Secondary/ high school or < | 766 (73,2)  | 280 (26,8) | Comparison category     | Did not enter the final model |
| Technical studies           | 82 (76,6)   | 25 (23,4)  | 0,87 (0,60-1,26) 0,460  | Did not enter the final model |
| University studies          | 1748 (75,5) | 567 (24,5) | 0,91 (0,76-1,09) 0,314  | Did not enter the final model |
| Studies of posgrado         | 19 (86,4)   | 3 (13,6)   | 0,51 (0,22-1,18) 0,116  | Did not enter the final model |
| <b>Type of university</b>   |             |            |                         |                               |
| Public or state             | 987 (78,2)  | 275 (21,8) | Comparison category     | Comparison category           |
| Private or private          | 1594 (72,9) | 592 (27,1) | 1,24 (1,04-1,48) 0,015  | 1,09 (0,93-1,28) 0,286        |
| <b>Year of studies*</b>     | 2 (1-4)     | 2 (1-4)    | 0,97 (0,93-1,02) 0,214  | Did not enter the final model |
| <b>Study medicine</b>       |             |            |                         |                               |
| No                          | 1523 (78,1) | 426 (21,9) | Comparison category     | Comparison category           |
| Yes                         | 1066 (70,4) | 449 (29,6) | 1,36 (1,14-1,62) 0,001  | 1,22 (1,05-1,41) 0,008        |
| <b>Cell phone use*</b>      | 8 (5-12)    | 9 (6-14)   | 1,02 (1,01-1,04) 0,002  | 1,00 (0,99-1,02) 0,700        |
| <b>Computer use*</b>        | 7 (4-10)    | 10 (6-14)  | 1,05 (1,04-1,07) <0,001 | 1,05 (1,04-1,07) <0,001       |

191 \*Variable taken quantitatively. Shours per day on average. The reasons for crude prevalence  
192 (RPC), Adjusted (RPa), the confidence intervals at 95% (IC95%) and p-values were obtained  
193 with generalized linear models (Poisson family, log link function, fit for robust variances and by  
194 country of residence).

## 195 Discussion

196 The objective was to determine the factors associated with suffering from neck pain, dry  
197 eye and Sjögren's syndrome in Latin American students during the first wave of COVID-19.  
198 Many of the Latin American countries had to incorporate online learning into their education



199 system, which caused many alterations in the health of the student population, either at the school  
200 level or at the university level.

201 Our study reported that more hours on the computer were associated with a higher  
202 frequency of neck pain, dry eye and Sjögren's syndrome; students who reported dry eye used the  
203 computer on average 8 hours a day, students who had neck pain and Sjögren's syndrome spent  
204 more hours a day in front of the computer (10 hours average and range of 6-14 hours). This is  
205 consistent with the research carried out by Espinoza, who evaluated students at the primary level  
206 and reported that of the total number of students, 40% spent 3-6 hours and 62% did not use the  
207 screen protector; therefore, he concluded that computer use had an impact on the visual acuity of  
208 schoolchildren. (22). Another study mentions that even before receiving a virtual education, there  
209 were already pathologies / ailments that were related to prolonged time in front of a computer  
210 (13).

211 Neck pain was more prevalent among women (13% more compared to men), as well as  
212 a higher prevalence of dry eye (15% more compared to men) and Sjögren's syndrome (10% more  
213 compared to men), in a study among university students on head-neck pain and the degree of  
214 disability in relation to computer use. It was reported that the female population was the most  
215 affected, in addition, the statistical analysis showed a high prevalence (57% with neck pain and  
216 43% with neck pain plus headache); having a relationship according to the number of hours that  
217 the computer was used and the practice of sport, however, that no relationship was found between  
218 headache and computer use (23). Female gender also had higher risk in Asian study ( $p= 0,026$ ),  
219 stating that women had more negative effects (24). This could be because hormonal changes  
220 occur in women during the reproductive cycle and many students use hormonal contraceptives,  
221 which could cause a variation in the lipids and proteins of the meibomian glands, which would  
222 condition dry eye (25). This needs further research, because if so, women should be instructed to  
223 protect themselves more carefully, which could lead to significant long-term pathologies.

224 Medical students had more frequent dry eye and Sjögren's syndrome. A fact that was also  
225 demonstrated in a Peruvian study, where male medicine students between the ages of 16-23 years  
226 had worse visual health, who spent more than 6 hours a day in front of the computer and more  
227 than 5 hours in front of the cell phone (26). In Thailand a study was associated with studying  
228 medicine or to be paramedics with Dry Eye Syndrome, which could be due to the great  
229 psychological stress experienced in the pandemic (24), In addition, students diagnosed with  
230 Sjögren's syndrome use the computer between 4-10 hours a day, as well as the cell phone between  
231 6-14 hours; so, we can say that the greater the number of hours on the cell phone and computer  
232 there is a greater probability of suffering from Sjögren's syndrome. It is known that the  
233 coronavirus pandemic led people to opt for teleworking, as well as online education, allowing  
234 workers and students to continue their work remotely; however, excessive use of some devices  
235 can lead to visual problems (27). It is recommended to evaluate other careers, to expand this work,  
236 since there was an important access to medical students, this because the main authors are doctors,  
237 however, this limitation was partial, because there was also a significant number of respondents  
238 from other careers, which would be a starting point for other researchers to measure these realities  
239 in other areas, professions, or occupations.

240 As for the degree of instruction, graduate students had more neck pain, but high school  
241 students had a higher frequency of dry eye, there may be different causes that condition this  
242 pathology and affect a certain group, especially this may be related to the longer time of use of  
243 the computer or cell phone, as well as, bad postures in front of these devices (27, 28). High school  
244 students compared to other students of different grade/instruction reported having dry eye

245 symptoms in 45%, this unlike university students, who presented more dry eye or Sjögren's  
246 syndrome; as reported in another study, where high school students reported headaches, neck pain  
247 and also visual problems (29). This is related to what was reported in Saudi Arabia, where 50%  
248 of the participants of students were not able to have control over their emotions, overvaluing their  
249 link with cell phones, using them even before doing any other activity, which increased their  
250 possibility of developing Dry Eye Syndrome and also generates a distortion of body mechanics;  
251 causing muscle aches in the neck, shoulders, back and whole body (30).

252 In private universities a higher percentage of neck pain was found, although this  
253 difference was only 7% with respect to those of public universities, this was statistically  
254 significant when adjusted with other variables in the final model. There are still not many results  
255 of this type, which find differences between the presentation of neck pain according to whether  
256 they belonged to a public or private school, but if it has been reported that there are differences  
257 between workers of private companies according to their time of exposure to screens, so more  
258 research should be done according to the type of context in which students and even professionals  
259 are, since, it is known that institutions vary in their way of providing protection mechanisms,  
260 training and even the motivation to protect themselves (12, 13). There are descriptive reports that  
261 show this reality in only one type of population, for example, in a private Peruvian university  
262 musculoskeletal pain and postural load due to work were evidenced; being the most affected area  
263 located at the cervical level (79%); with a pain time greater than 7 days, inadequate postures in  
264 66% of respondents and 45% with a high risk level (31). These differences may have been  
265 generated by the conditions offered by private universities, since, according to a study, it showed  
266 that these institutions had good coverage and access to virtual education, in addition, to perceive  
267 that their teachers were more qualified in front of information technologies (32), which would  
268 facilitate the adequate teaching of virtual classes and, therefore, with less repercussions than those  
269 of public universities. Future research is expected to help find more answers among these groups  
270 of respondents.

271 The results found are very interesting, since they show a reality six months after the  
272 beginning of the most disastrous stage for many Latin American countries during the pandemic,  
273 although there are limitations that the results cannot be extrapolated to all the students, countries  
274 or study centers from which the data came (this because that objective was not met, but if the  
275 power to find important associations), many of the respondents were from medicine (or health  
276 sciences) and could not have many other variables that could influence the presentation of these  
277 pathologies (such as the use of ergonomic elements, if their university gave them training, the  
278 way of using the elements, among others). Despite all the limitations, it was possible to survey  
279 more than three thousand students throughout Latin America, and the vast majority of crossings  
280 had a very good power, so these results can give new policies for the management of this problem,  
281 which post pandemic would continue to be generated, since, wearer facing A new reality,  
282 especially because many schools have incorporated virtuality as part of teaching. For this reason,  
283 it is recommended that more studies be carried out on the subject, in specific populations, with  
284 diverse interventions and with varied methodological designs, so that new forms of intervention  
285 are available to minimize this problem among the student community and other populations that  
286 present it.

## 287 **Conclusion**

288 For all the above, it is concluded that the three pathologies / ailments were associated  
289 with the greatest number of hours of computer use and sex, medical students had more frequencies

290 of dry eye and Sjögren's syndrome, graduate students had more neck pain, but university students  
291 had less dry eye and those from private universities had more neck pain.

292 **Author Contributions:** Conceptualization CRM, BGL, ILZL, DAC, MFF, CAV, MAVE, VSA,  
293 TR, LIZ, EET. Methodology C.R.M validation C.R.M, formal analysis, C.R.M, data curation:  
294 C.R.M, writing original draft preparation: CRM, BGL, ILZL, DAC, MFF, CAV, MAVE, VSA,  
295 TR, LIZ and EET, writing-review and editing: CRM, BGL, ILZL, DAC , MFF, CAV, MAVE,  
296 VSA, TR, LIZ and EET, visualization :CRM, BGL, ILZL, DAC , MFF, CAV, MAVE, VSA, TR,  
297 LIZ and EET

298 **Funding:** The current article processing charges (publication fees) were funded by the Facultad  
299 de Ciencias Médicas (FCM) (2-03-01-01), Universidad Nacional Autónoma de Honduras  
300 (UNAH), Tegucigalpa, MDC, Honduras, Central America (granted to Dra. Espinoza).

301 **Institutional Review Board Statement:** The study was conducted under the Declaration of  
302 Helsinki. This research's preparation and execution fully complied with the fundamental ethical  
303 principles of autonomy, justice, beneficence, and non-maleficence. The Act Number (0013-2022-  
304 UPAO), approved by the Bioethics Committee of the Universidad Privada Antenor Orrego.

305 **Data Availability Statement:** The data presented in this study are available on request from the  
306 corresponding author.

307 **Acknowledgments:** To the surveyors of the work, who supported very actively during the  
308 execution of the research, as well as to the Norbert Wiener Private University, which financed the  
309 process of quality control of the data.

310 **Conflicts of Interest:** The authors declare no conflict of interest.

### 311 **Literature Cited**

312 1. UNESCO. Con uno de cada cinco educandos fuera de la escuela, la UNESCO moviliza a los  
313 ministros de educación para hacer frente a la crisis de la COVID-19; 2022(consultado 2023).  
314 Available from: URL: [https://www.unesco.org/en/articles/one-five-learners-kept-out-school-](https://www.unesco.org/en/articles/one-five-learners-kept-out-school-unesco-mobilizes-education-ministers-face-covid-19-crisis)  
315 [unesco-mobilizes-education-ministers-face-covid-19-crisis](https://www.unesco.org/en/articles/one-five-learners-kept-out-school-unesco-mobilizes-education-ministers-face-covid-19-crisis).

316 2. Imanol Ordorika. Pandemia y educación superior 2020. Available from: URL:  
317 [https://www.scielo.org.mx/scielo.php?pid=s0185-27602020000200001&script=sci\\_arttext](https://www.scielo.org.mx/scielo.php?pid=s0185-27602020000200001&script=sci_arttext).

318 3. Dedeilia A, Sotiropoulos MG, Hanrahan JG, Janga D, Dedeilias P, Sideris M. Medical and  
319 Surgical Education Challenges and Innovations in the COVID-19 Era: A Systematic Review. In  
320 Vivo 2020; 34(3 Suppl):1603–11.

321 4. Barráez DP. La educación a distancia en los procesos educativos: Contribuye  
322 significativamente al aprendizaje. RTED 2020; 8(1):41–9.

323 5. Verónica López Niño. Mirada Sistémica de una Experiencia de Educación a Distancia. 1 2018;  
324 2(1):28–47. Available from: URL: <https://tisd.ucv.ve/index.php/rev/article/view/29>.

325 6. Gutierrez-Moreno A. Educación en tiempos de crisis sanitaria: pandemia y educación. Prax.  
326 2020; 16(1):7–10.

327 7. Fundación Wiese. El gran reto de la educación virtual en tiempos de pandemia; 2020  
328 (consultado 2023). Available from: URL: [https://www.fundacionwiese.org/blog/es/el-gran-reto-](https://www.fundacionwiese.org/blog/es/el-gran-reto-de-la-educacion-virtual-en-tiempos-de-pandemia/)  
329 [de-la-educacion-virtual-en-tiempos-de-pandemia/](https://www.fundacionwiese.org/blog/es/el-gran-reto-de-la-educacion-virtual-en-tiempos-de-pandemia/).

- 330 8. Del Aguilar Gordón FR. Del aprendizaje en escenarios presenciales al aprendizaje virtual en  
331 tiempos de pandemia. *Estud. pedagóg.* 2020; 46(3):213–23.
- 332 9. López-Álvarez C. inclusión en tiempos de pandemia: las ventajas y las dificultades de la  
333 educación virtual para los estudiantes con diversidad funcional. *CÁTEDRA* 2022; 5(1):131–45.
- 334 10. Araúz E, Mojica C, Zurdo L, Gómez E. Estudio de factores de riesgos ergonómicos presentes  
335 en la educación a distancia. *RIC* 2021; 7.
- 336 11. Fundación para la Prevención de Riesgos Laborales. RIESGOS RELACIONADOS CON LA  
337 ERGONOMÍA; 2015(Consultado 23 de 2023). Available from: URL:  
338 [https://riesgoslaborales.saludlaboral.org/portal-preventivo/riesgos-laborales/riesgos-](https://riesgoslaborales.saludlaboral.org/portal-preventivo/riesgos-laborales/riesgos-relacionados-con-la-hergonomia/pantallas-visualizacion-de-datos-pvd/)  
339 [relacionados-con-la-hergonomia/pantallas-visualizacion-de-datos-pvd/](https://riesgoslaborales.saludlaboral.org/portal-preventivo/riesgos-laborales/riesgos-relacionados-con-la-hergonomia/pantallas-visualizacion-de-datos-pvd/).
- 340 12. Montaudon Tomas CM, Pinto López I, Amsler A. Salud ocupacional y trabajo remoto durante  
341 la pandemia: riesgos y recomendaciones. *Vinculatégica* 2022; 7(2).
- 342 13. Hodelín Hodelín Y, Reyes García Z. L, Hurtado Cumbá G, Batista Salmon M. Riesgos sobre  
343 tiempo prolongado frente a un ordenador. *Revista Información Científica [Internet]* 2016;  
344 1(95):175–90. Available from: URL: <https://www.redalyc.org/articulo.oa?id=551762874018>.
- 345 14. Hoy DG, Protani M, De R, Buchbinder R. The epidemiology of neck pain. *Best Pract Res*  
346 *Clin Rheumatol* 2010; 24(6):783–92.
- 347 15. Hernández A. Acceso, usos y problemas en la educación virtual: una aproximación a las  
348 experiencias de estudiantes y docentes durante la cuarentena obligatoria en Argentina. *pacha*  
349 2020; 1(1):68–75.
- 350 16. Liviero B, Favalli M, Macció P, Aguirre T, Romera Verzini J, Endrek M. Pantallas y síntomas  
351 de la superficie ocular en cuarentena por COVID-19 2020; 13(4). Available from: URL:  
352 <https://revistaoce.com/index.php/revista/article/view/34>.
- 353 17. White P, Lewith G, Prescott P. The core outcomes for neck pain: validation of a new outcome  
354 measure. *Spine* 2004; 29(17):1923–30.
- 355 18. Kovacs FM, Bagó J, Royuela A, Seco J, Giménez S, Muriel A et al. Psychometric  
356 characteristics of the Spanish version of instruments to measure neck pain disability. *BMC*  
357 *Musculoskelet Disord* 2008; 9:42.
- 358 19. Martinez JD, Galor A, Amescua G, Ramos-Betancourt N, Beltrán F, Babayán Sosa A et al.  
359 Transcultural validation of the 5-Item Dry Eye Questionnaire for the Mexican population. *Int*  
360 *Ophthalmol* 2019; 39(10):2313–24.
- 361 20. Akowuah PK, Adjei-Anang J, Nkansah EK, Fummey J, Osei-Poku K, Boadi P et al.  
362 Comparison of the performance of the dry eye questionnaire (DEQ-5) to the ocular surface disease  
363 index in a non-clinical population. *Cont Lens Anterior Eye* 2022; 45(3):101441.
- 364 21. Chalmers RL, Begley CG, Caffery B. Validation of the 5-Item Dry Eye Questionnaire (DEQ-  
365 5): Discrimination across self-assessed severity and aqueous tear deficient dry eye diagnoses.  
366 *Cont Lens Anterior Eye* 2010; 33(2):55–60.
- 367 22. Medina Espinoza IF. Uso de la computadora, y su impacto en la agudeza visual de los  
368 educandos de la ciudad de Tarma - Perú; 2020 (Consultado 2023). Available from: URL:  
369 <http://repositorio.udh.edu.pe/123456789/2479>.

- 370 23. Abelaira Martínez T. Dolor de cuello y cabeza y grado de discapacidad en relación con el uso  
371 del ordenador en la población universitaria. Biblioteca digital Universidad de Alcalá (Consultado  
372 24 febrero 2023) 2011. Available from: URL: <https://ebuah.uah.es/dspace/handle/10017/9187>.
- 373 24. Tangmonkongvoragul C, Chokesuwattanaskul S, Khankaeo C, Punyaseeve R, Nakkara L,  
374 Moolsan S et al. Prevalence of symptomatic dry eye disease with associated risk factors among  
375 medical students at Chiang Mai University due to increased screen time and stress during COVID-  
376 19 pandemic. PLOS ONE 2022; 17(3):e0265733. Available from: URL:  
377 <https://journals.plos.org/plosone/article?id=10.1371/journal.pone.0265733>.
- 378 25. Andrea Jiménez Caro, Claudia Jiménez Forero. Cambios en la película lagrimal con el uso  
379 simultáneo de lentes de contacto y tratamientos anticonceptivos hormonales. Ciencia y  
380 Tecnología para la Salud Visual y Ocular 2017; 15(1):79–89. Available from: URL:  
381 <https://dialnet.unirioja.es/servlet/articulo?codigo=5863305>.
- 382 26. Quispe Torres, Diego Leonel Justo. Prevalencia y factores asociados al síndrome visual  
383 informático en estudiantes de Medicina Humana del Perú durante la educación virtual por la  
384 pandemia del COVID-19. Universidad Ricardo Palma; PE.
- 385 27. Alcívar López S, Aray Cedeño M, Hidalgo Toasa Y, Mero Santana BR, Pinargote Chávez J,  
386 Zambrano Roldán M. Detección de problemas visuales que pueden influir en la nueva modalidad  
387 de clases y trabajo virtuales. QhaliKay Rev Cienc Salud 2021; 5(2):42. Available from: URL:  
388 <https://revistas.utm.edu.ec/index.php/qhalikay/article/view/2810>.
- 389 28. Ledezma MA. Diseño, implementación y evaluación de un programa de pausas activas de  
390 estudiantes de posgrado de una universidad privada de la ciudad de Cali; 2018. Available from:  
391 URL: [https://bibliotecadigital.univalle.edu.co/bitstream/id/34956fc2-310b-4d93-a4c9-  
392 037c46b9a71a/3484-0525794.pdf](https://bibliotecadigital.univalle.edu.co/bitstream/id/34956fc2-310b-4d93-a4c9-037c46b9a71a/3484-0525794.pdf).
- 393 29. Rios GEM NT. Problemas de salud asociados al uso del celular en estudiantes de secundaria,  
394 Institución Educativa de Villa María del Triunfo - 2020; 2020. Available from: URL:  
395 <https://repositorio.ucv.edu.pe/handle/20.500.12692/80126>.
- 396 30. Gaowgzeh Riziq, Allah Mustafa. The Use Of Smartphones In Distance Learning/ E-Learning/  
397 Online Classes And Its Impact To Neck Pain In The Light Of The Covid-19 Pandemic; 2020.  
398 Available from: URL: [https://www.researchgate.net/profile/riziq-allah-  
399 gaowgzeh/publication/350138177\\_the\\_use\\_of\\_smartphones\\_in\\_distance\\_learning\\_e-  
400 learning\\_online\\_classes\\_and\\_its\\_impact\\_to\\_neck\\_pain\\_in\\_the\\_light\\_of\\_the\\_covid-  
401 19\\_pandemic](https://www.researchgate.net/profile/riziq-allah-gaowgzeh/publication/350138177_the_use_of_smartphones_in_distance_learning_e-learning_online_classes_and_its_impact_to_neck_pain_in_the_light_of_the_covid-19_pandemic).
- 402 31. Farfan Gutierrez AN. Dolor musculoesquelético y carga postural de trabajo de los estudiantes  
403 de la Clínica Estomatológica de la Universidad Alas Peruanas Filial Andahuaylas 2017.  
404 Universidad Alas Peruanas; PE.
- 405 32. Huanca-Arohuanca J, Supo-Condori F, Sucari Leon R, Supo Quispe L. El problema social de  
406 la educación virtual universitaria en tiempos de pandemia, Perú. InnovEd 2020;  
407 22(Especial):115–28.
- 408
